# Supplementary material
Source: ML conference proceedings conference paper supplement (https://openreview.net/forum?id=ZfFR4d5gUM)
Supplement: supplementary_material [file attachment]

## Appendix

**Organization of the Appendix** In Section A, we introduce additional notations that will be used throughout the Appendix, then proceed to prove useful technical lemmas. We proceed in Section B to prove the results presented in the main text. Section C contains details about our experimental settings as well as some additional simulations.

### A Additional notations and technical lemmas

For a vector  $a$ , we denote  $\|a\|$  its  $\ell^2$ -norm,  $\|a\|_1$  its  $\ell^1$ -norm and  $\|a\|_\infty$  its  $\ell^\infty$ -norm. For matrices  $H$ ,  $\|H\|$  denotes the operator norm associated to the  $\ell^2$  norm and  $\|H\|_F$  denotes the Frobenius norm. For real-valued functions  $f$ ,  $\|f\|_\infty$  denotes the supremum norm.

In all of the Appendix, we denote  $u_0 = -\eta/2$  and  $u_{m+1} = 1 + \eta/2$ . Note that  $\sigma_\eta(x - u_0) = 1$  for all  $x \in [0, 1]$ , meaning that  $\sigma_\eta(\cdot - u_0)$  corresponds to the bias term. This notation allows to treat the bias term in a unified fashion with respect to the other terms of  $f(x; a, u)$ . Since  $u_i \in (0, 1)$  for  $i \in \{1, \dots, m\}$ , we assume in the following w.l.o.g. that the  $(u_i)_{0 \leq i \leq m+1}$  are ordered in increasing order. Note that we prove in the following that the  $(u_i)_{1 \leq i \leq m}$  do not cross during the dynamics, so they remain ordered throughout the dynamics.

The proofs involve comparisons of some quantities when  $\eta > 0$  and when  $\eta = 0$ . To avoid confusion, we make explicit the dependency of  $L$  on  $\eta \geq 0$ , i.e., we let  $L_\eta(a, u)$  in place of  $L(a, u)$  of the main paper, and similarly, when the arg min is well-defined and unique,

$$a_\eta^*(u) = \arg \min_{a \in \mathbb{R}^{m+1}} L_\eta(a, u).$$

in place of  $a^*(u)$ . Similarly, we now make explicit the dependence of  $f$  on  $\eta \geq 0$ , i.e., we denote

$$f_\eta(x; a, u) = a_0 + \sum_{j=1}^m a_j \sigma_\eta(x - u_j) = \sum_{j=0}^m a_j \sigma_\eta(x - u_j).$$

The Hessian of the quadratic function  $L_\eta(\cdot, u)$  is denoted  $H_\eta(u) \in \mathbb{R}^{(m+1) \times (m+1)}$  (in place of  $H(u)$ ), and satisfies that, for  $i, j \in \{0, \dots, m\}$ ,

$$H_{\eta,ij}(u) = \int_0^1 \sigma_\eta(x - u_i) \sigma_\eta(x - u_j) dx.$$

Also let, for  $\eta \geq 0$  and  $u \in \mathbb{R}^m$ ,  $b_\eta(u) \in \mathbb{R}^{m+1}$  such that, for  $j \in \{0, \dots, m\}$ ,

$$b_{\eta,j}(u) = \int_0^1 f^*(x) \sigma_\eta(x - u_j) dx.$$

Finally, we let  $\mathcal{U}_\eta$  in place of  $\mathcal{U}$  in the paper.

With these notations, we have, for  $\eta \geq 0$  and  $a, u \in \mathbb{R}^m$ ,

$$\begin{aligned} \frac{\partial L_\eta}{\partial u_j}(a, u) &= \int_0^1 \frac{\partial f_\eta(x; a, u)}{\partial u_j} (f_\eta(x; a, u) - f^*(x)) dx \\ &= -a_j \int_0^1 \sigma'_\eta(x - u_j) \left( \sum_{k=0}^m a_k \sigma_\eta(x - u_k) - f^*(x) \right) dx. \end{aligned} \quad (10)$$

and

$$\begin{aligned} \frac{\partial L_\eta}{\partial a_j}(a, u) &= \int_0^1 \frac{\partial f_\eta(x; a, u)}{\partial a_j} (f_\eta(x; a, u) - f^*(x)) dx \\ &= \int_0^1 \sigma_\eta(x - u_j) \left( \sum_{k=0}^m a_k \sigma_\eta(x - u_k) - f^*(x) \right) dx \\ &= H_{\eta,j}(u)^\top a - b_{\eta,j}(u). \end{aligned} \quad (11)$$

We now move on to a series to lemmas that will be helpful in the proofs of Appendix B.

404 **Lemma 1.** For  $\eta \geq 0$  and  $u \in \mathbb{R}^m$ , we have

$$\|b_\eta(u) - b_0(u)\| \leq M\eta\sqrt{m+1} \quad \text{and} \quad \|b_\eta(u)\| \leq M\sqrt{m+1}.$$

405 *Proof.* For any  $j \in \{0, \dots, m\}$ ,

$$\begin{aligned} |b_{\eta,j}(u) - b_{0,j}(u)| &= \left| \int_0^1 f^*(x)(\sigma_\eta(x - u_j) - \sigma_0(x - u_j))dx \right| \\ &\leq \|f^*\|_\infty \int_0^1 |\sigma_\eta(x - u_j) - \sigma_0(x - u_j)| dx \\ &\leq M\eta, \end{aligned}$$

406 where in the last step we use that  $\|f^*\|_\infty \leq M$  and that  $\sigma_\eta(x) = 0$  for  $x \leq -\eta/2$ ,  $\sigma_\eta(x) \in [0, 1]$  for  
407  $-\eta/2 < x < \eta/2$  and  $\sigma_\eta(x) = 1$  for  $x \geq \eta/2$ .

408 Similarly,

$$|b_{\eta,j}(u)| = \left| \int_0^1 f^*(x)\sigma_\eta(x - u_j)dx \right| \leq \|f^*\|_\infty \leq M.$$

409

□

410 **Lemma 2.** For  $\eta \geq 0$  and  $u \in \mathcal{U}_\eta$ ,  $H_\eta(u) = H_0(u) + D_\eta$ , where  $D_\eta$  is a diagonal matrix whose  
411 elements are independent of  $u$  and bounded in absolute value by  $\eta/2$ .

412 *Proof.* Let  $i, j \in \{0, \dots, m\}$ , and denote  $c = \max(u_i, u_j, 0)$ . Then

$$H_{0,ij}(u) = \int_0^1 \sigma_0(x - u_i)\sigma_0(x - u_j)dx = 1 - c.$$

413 If  $i = j = 0$ ,  $\max(u_i, u_j) = -\eta/2$ , and  $H_{\eta,ij}(u) = 1 = H_{0,ij}(u)$ . If  $i = j \neq 0$ ,

$$\begin{aligned} H_{\eta,ij}(u) &= \int_0^1 \sigma_\eta(x - c)^2 dx \\ &= 1 - c - \frac{\eta}{2} + \int_{c-\eta/2}^{c+\eta/2} \sigma_\eta(x - c)^2 dx \\ &= H_{0,ij}(u) - \frac{\eta}{2} + \eta \int_{-1/2}^{1/2} \sigma^2. \end{aligned}$$

414 Note that the last integral is non-negative and less than 1, hence  $|H_{\eta,ij}(u) - H_{0,ij}(u)| \leq \eta/2$ . Finally,  
415 if  $i \neq j$ , since  $|u_i - u_j| > \eta$ ,

$$H_{\eta,ij}(u) = \int_0^1 \sigma_\eta(x - u_i)\sigma_\eta(x - u_j)dx = \int_0^1 \sigma_\eta(x - \max(u_i, u_j))dx.$$

416 Furthermore,  $0 < \max(u_i, u_j) < 1 - \frac{\eta}{2}$ , thus

$$H_{\eta,ij}(u) = \int_0^1 \sigma_\eta(x - c)dx = 1 - c - \frac{\eta}{2} + \int_{c-\eta/2}^{c+\eta/2} \sigma_\eta(x - c)dx = 1 - c,$$

417 where the last equality comes from the oddness of  $\sigma - 1/2$ . □

418 **Lemma 3.** For  $\eta > 0$ , let  $a_\eta^* : u \in \mathcal{U}_\eta \mapsto a_\eta^*(u)$ . Then  $a_\eta^*$  is differentiable and for any  $u \in \mathcal{U}_\eta$ ,

$$\left\| \frac{\partial a_\eta^*(u)}{\partial u} \right\| \leq \frac{8}{\Delta(u)} \left( 2(m+1)\|a_\eta^*(u)\| + M \right).$$

419 *Proof.* By Proposition 1 (whose proof does not rely on this lemma), for  $u \in \mathcal{U}_\eta$ ,  $L_\eta(\cdot, u)$  has a  
420 unique minimizer  $a_\eta^*(u)$ , which is equal to  $H_\eta(u)^{-1}b_\eta(u)$  by (11). Furthermore,  $H_\eta$  and  $b_\eta$  are  
421 differentiable with respect to  $u$ , hence  $a_\eta^*$  is also differentiable with respect to  $u$ , and we have

$$\frac{\partial a_\eta^*(u)}{\partial u_k} = -H_\eta(u)^{-1} \frac{\partial H_\eta}{\partial u_k}(u) a_\eta^*(u) + H_\eta(u)^{-1} \frac{\partial b_\eta}{\partial u_k}(u).$$

422 Denote  $w_k(u) := \frac{\partial H_\eta}{\partial u_k}(u) a_\eta^*(u)$  and  $W(u)$  the  $(m+1) \times (m+1)$  matrix formed by stacking  
 423 column-wise the vectors  $(w_k(u))_{0 \leq k \leq m}$ . Then

$$\frac{\partial a_\eta^*(u)}{\partial u} = -H_\eta(u)^{-1} W(u) + H_\eta(u)^{-1} \frac{\partial b_\eta}{\partial u}(u).$$

424 We now estimate the Frobenius norm of the matrix  $W(u)$ . By Lemma 2, for  $u \in \mathcal{U}_\eta$ ,  $H_\eta(u) =$   
 425  $H_0(u) + D_\eta$ . Take  $i, j \in \{0, \dots, m\}$ , then

$$H_{\eta,ij}(u) = H_{0,ij}(u) + D_{\eta,ij} = \int_0^1 \sigma_0(x - u_i) \sigma_0(x - u_j) dx + D_{\eta,ij} = 1 - \max(u_i, u_j, 0) + D_{\eta,ij}.$$

426 Hence  $\frac{\partial H_{\eta,ij}}{\partial u_k} = 0$  if  $i, j \neq k$ . Further, if  $i = k$  and  $j \neq k$ ,

$$\left| \frac{\partial H_{\eta,ij}}{\partial u_k}(u) \right| = \left| \frac{\partial}{\partial u_i}(1 - \max(u_i, u_j)) \right| \leq 1.$$

427 Of course, the bound  $\left| \frac{\partial H_{\eta,ij}}{\partial u_k}(u) \right| \leq 1$  also holds when  $j = k$  and  $i \neq j$ . Finally, a similar bound  
 428 shows that  $\left| \frac{\partial H_{\eta,ij}}{\partial u_k}(u) \right| \leq 2$  when  $i = j = k$ .

429 As a consequence, for  $k, i \in \{0, \dots, m\}$ ,

$$|w_{k,i}(u)| \leq \sum_{j=0}^m \left| \frac{\partial H_{\eta,ij}}{\partial u_k}(u) \right| |a_{\eta,j}^*(u)| \leq \begin{cases} |a_{\eta,k}^*(u)| & \text{if } i \neq k, \\ |a_{\eta,k}^*(u)| + \|a_\eta^*(u)\|_1 & \text{if } i = k. \end{cases}$$

430 Thus

$$\begin{aligned} \|W(u)\|_F &= \left( \sum_{i=0}^m \sum_{k=0}^m |w_{k,i}(u)|^2 \right)^{1/2} \leq \left( \sum_{i=0}^m \left( \sum_{k=0}^m |w_{k,i}(u)| \right)^2 \right)^{1/2} \\ &\leq \left( \sum_{i=0}^m (2\|a_\eta^*(u)\|_1)^2 \right)^{1/2} = 2\sqrt{m+1} \|a_\eta^*(u)\|_1. \end{aligned}$$

431 With a reasoning similar to the above, note that  $\frac{\partial b_\eta}{\partial u}(u)$  is a diagonal matrix with diagonal entries  
 432 in  $[-M, M]$ . Finally, putting these elements together, using Proposition 1 and that  $\|W(u)\| \leq$   
 433  $\|W(u)\|_F$ , we obtain

$$\left\| \frac{\partial a_\eta^*(u)}{\partial u} \right\| \leq \|H_\eta(u)^{-1}\| \|W(u)\|_F + \|H_\eta(u)^{-1}\| \left\| \frac{\partial b_\eta}{\partial u}(u) \right\| \leq \frac{8}{\Delta(u)} (2\sqrt{m+1} \|a_\eta^*(u)\|_1 + M).$$

434 □

435 The following lemma gives exact formulae for the derivative of the loss  $L_\eta$  with respect to the  
 436 positions of the neurons, evaluated for  $a = a_0^*(u)$ , that is the best piecewise constant approximation  
 437 of  $f^*$  with subdivision  $\{u_1, \dots, u_m\}$ . Note that the formulae are the same as in Section 4.2, but the  
 438 derivation is slightly more intricate since we consider here the loss  $L_\eta$  and not  $L_0$ .

439 **Lemma 4.** Take  $\eta > 0$  and  $u \in \mathcal{U}_\eta$  such that there are at least two neurons on each piece  $[v_i, v_{i+1}]$   
 440 of  $f^*$ . Then, if  $u_j$  does not flank a discontinuity of  $f^*$ ,

$$\frac{\partial L_\eta}{\partial u_j}(a_0^*(u), u) = 0.$$

441 Furthermore, for a discontinuity  $v_i$ , denote  $u_i^L$  is the closest neuron to its left and  $u_i^R$  the closest  
 442 neuron to its right. If  $v_i - u_i^L \geq \frac{\eta}{2}$  and  $u_i^R - v_i \geq \frac{\eta}{2}$ , then

$$\begin{aligned} \frac{\partial L_\eta}{\partial u_i^L}(a_0^*(u), u) &= -\frac{1}{2} \frac{(u_i^R - v_i)^2}{(u_i^R - u_i^L)^2} (f_i^* - f_{i-1}^*)^2, \\ \frac{\partial L_\eta}{\partial u_i^R}(a_0^*(u), u) &= \frac{1}{2} \frac{(v_i - u_i^L)^2}{(u_i^R - u_i^L)^2} (f_i^* - f_{i-1}^*)^2. \end{aligned}$$

443 *Proof.* In this proof, let us denote for simplicity  $a = a_0^*(u)$ . At the condition that there is at least two  
 444 neurons on each piece of  $f^*$ , Section 4.2 gives the optimal approximation  $f_0(x; a, u)$  of  $f^*$  that is  
 445 piecewise constant with respect to the subdivision  $\{u_1, \dots, u_m\}$ . As a consequence, we easily get  
 446 the value of  $a$ . Namely, if  $u_j$  does not flank a discontinuity of  $f^*$ , the value of  $f_0(x; a, u)$  is locally  
 447 constant around  $u_j$ , thus  $a_j = 0$ . Plugging into (10), we obtain

$$\frac{\partial L_\eta}{\partial u_j}(a, u) = 0.$$

448 Further, for a discontinuity  $v_i$ , denote respectively  $a_i^L$  and  $a_i^R$  the coefficients associated to  $u_i^L$  and  
 449  $u_i^R$ . At  $u_i^L$ , the value of  $f_0(x; a, u)$  jumps from  $f_{i-1}^*$  to  $\frac{v_i - u_i^L}{u_i^R - u_i^L} f_{i-1}^* + \frac{u_i^R - v_i}{u_i^R - u_i^L} f_i^*$ , thus

$$a_i^L = \frac{v_i - u_i^L}{u_i^R - u_i^L} f_{i-1}^* + \frac{u_i^R - v_i}{u_i^R - u_i^L} f_i^* - f_{i-1}^* = \frac{u_i^R - v_i}{u_i^R - u_i^L} (f_i^* - f_{i-1}^*).$$

450 Similarly, we have

$$a_i^R = \frac{v_i - u_i^L}{u_i^R - u_i^L} (f_i^* - f_{i-1}^*).$$

451 We now compute, using (10),

$$\begin{aligned} \frac{\partial L_\eta}{\partial u_i^L}(a, u) &= -a_i^L \int_0^1 \sigma'_\eta(x - u_i^L) (f_\eta(x; a, u) - f^*(x)) dx \\ &= -a_i^L \int_{u_i^L - \eta/2}^{u_i^L + \eta/2} \sigma'_\eta(x - u_i^L) (f_\eta(x; a, u) - f^*(x)) dx. \end{aligned}$$

452 Using that  $\Delta(u) > 2\eta$  and that there are at least two neurons on each piece of  $f^*$ , we have  
 453 that  $u_i^L - v_{i-1} \geq 2\eta$ . Since, in addition, by assumption,  $v_i - u_i^L \geq \frac{\eta}{2}$ , we get that for  $x \in$   
 454  $[u_i^L - \frac{\eta}{2}, u_i^L + \frac{\eta}{2}]$ ,  $f^*(x) = f_{i-1}^*$ . Moreover, using again  $\Delta(u) \geq 2\eta$  that  $\sigma_\eta$  is equal to  $\sigma_0$  on  
 455  $(-\infty, -\eta/2]$  and  $[\eta/2, \infty)$ , we have for  $x \in [u_i^L - \frac{\eta}{2}, u_i^L + \frac{\eta}{2}]$ ,

$$f_\eta(x; a, u) = \sum_{k=0}^m a_k \sigma_\eta(x - u_k) = f_0\left(u_i^L - \frac{\eta}{2}; a, u\right) + a_i^L \sigma_\eta(x - u_i^L) = f_{i-1}^* + a_i^L \sigma_\eta(x - u_i^L).$$

456 Thus we obtain

$$\begin{aligned} \frac{\partial L_\eta}{\partial u_i^L}(a, u) &= -a_i^L \int_{u_i^L - \eta/2}^{u_i^L + \eta/2} \sigma'_\eta(x - u_i^L) a_i^L \sigma_\eta(x - u_i^L) dx \\ &= -\frac{(a_i^L)^2}{2} \left( \sigma_\eta\left(\frac{\eta}{2}\right)^2 - \sigma_\eta\left(-\frac{\eta}{2}\right)^2 \right) \\ &= -\frac{(a_i^L)^2}{2} \\ &= -\frac{1}{2} \frac{(u_i^R - v_i)^2}{(u_i^R - u_i^L)^2} (f_i^* - f_{i-1}^*)^2. \end{aligned}$$

457 The computation of  $\frac{\partial L_\eta}{\partial u_i^R}(a, u)$  is similar.

458 □

459 **Lemma 5.** Consider  $\eta \geq 0$  and  $u \in \mathcal{U}_\eta$  such that there are at least two neurons on each piece  
 460  $[v_i, v_{i+1}]$  of  $f^*$ . Then, for all  $x \in [0, 1]$ ,  $|f_\eta(x; a_0^*(u), u)| \leq M$ .

461 *Proof.* In the case where  $\eta = 0$ , the result easily follows from the expressions for  $f_0(x; a_0^*(u), u)$   
 462 provided in Section 4.2. We now assume  $\eta > 0$ .

463 Denote  $A_k^*(u) = \sum_{j=0}^k a_{0,j}^*(u)$  (with the convention  $A_{-1}^*(u) = 0$ ). Recall the convention  $u_0 =$   
 464  $-\eta/2$ . We compute

$$\begin{aligned} f_\eta(x; a_0^*(u), u) &= \sum_{k=0}^m a_{0,k}^*(u) \sigma_\eta(x - u_k) \\ &= \sum_{k=0}^m (A_k^*(u) - A_{k-1}^*(u)) \sigma_\eta(x - u_k) \\ &= \sum_{k=0}^{m-1} A_k^*(u) (\sigma_\eta(x - u_k) - \sigma_\eta(x - u_{k+1})) + A_m^*(u) \sigma_\eta(x - u_m) \end{aligned}$$

465 Note that  $A_k^*(u) = \lim_{x \rightarrow u_k+} f_0(x; a_0^*(u), u)$ , and thus, from the case  $\eta = 0$ , we have  $|A_k^*(u)| \leq M$ .  
 466 Moreover,  $\sigma_\eta$  is increasing and the  $u_k$  are in increasing order. We thus get

$$\begin{aligned} |f_\eta(x; a_0^*(u), u)| &\leq M \left( \sum_{k=0}^{m-1} (\sigma_\eta(x - u_k) - \sigma_\eta(x - u_{k+1})) + \sigma_\eta(x - u_m) \right) \\ &= M \sigma_\eta(x - u_0) \leq M. \end{aligned}$$

467

□

468 **Lemma 6.** Consider  $\eta > 0$  and  $u \in \mathcal{U}_\eta$  such that there are at least two neurons on each piece  
 469  $[v_i, v_{i+1}]$  of  $f^*$ . Then, for  $j \in \{0, \dots, m\}$ ,

$$|a_{0,j}^*(u)| \leq 2M$$

470 and, for any  $a \in \mathbb{R}^{m+1}$ ,

$$\left| \frac{\partial L_\eta}{\partial u_j}(a, u) - \frac{\partial L_\eta}{\partial u_j}(a_0^*(u), u) \right| \leq 2M(\sqrt{m+1} + 1) \|a - a_0^*(u)\| + \sqrt{m+1} \|a - a_0^*(u)\|^2.$$

471 *Proof.* The first statement of the Lemma comes from the explicit formulae for  $a_0^*(u)$  given in the  
 472 proof of Lemma 4, namely each  $a_{0,j}^*(u)$  is either zero or less in magnitude than the gap between two  
 473 pieces of  $f^*$  that is less than  $2M$ .

474 By (10), we have

$$\begin{aligned} &\left| \frac{\partial L_\eta}{\partial u_j}(a, u) - \frac{\partial L_\eta}{\partial u_j}(a_0^*(u), u) \right| \\ &= \left| a_j \int_0^1 \sigma'_\eta(x - u_j) (f_\eta(x; a, u) - f^*(x)) dx \right. \\ &\quad \left. - a_{0,j}^*(u) \int_0^1 \sigma'_\eta(x - u_j) (f_\eta(x; a_0^*(u), u) - f^*(x)) dx \right| \\ &\leq |a_j - a_{0,j}^*(u)| \int_0^1 \sigma'_\eta(x - u_j) |f_\eta(x; a_0^*(u), u) - f^*(x)| dx \\ &\quad + |a_j| \int_0^1 \sigma'_\eta(x - u_j) |f_\eta(x; a, u) - f_\eta(x; a_0^*(u), u)| dx. \end{aligned}$$

475 We bound the two terms separately. For the first term, we use Lemma 5.

$$\begin{aligned} \int_0^1 \sigma'_\eta(x - u_j) |f_\eta(x; a_0^*(u), u) - f^*(x)| &\leq \int_0^1 \sigma'_\eta(x - u_j) (|f_\eta(x; a_0^*(u), u)| + |f^*(x)|) \\ &\leq 2M \int_0^1 \sigma'_\eta(x - u_j) dx \leq 2M. \end{aligned}$$

476 We now continue with the second term.

$$|f_\eta(x; a, u) - f_\eta(x; a_0^*(u), u)| = \left| \sum_{k=0}^m (a_k - a_{0,k}^*(u)) \sigma_\eta(x - u_k) \right| \leq \|a - a_0^*(u)\|_1,$$

477 and thus

$$\begin{aligned} \int_0^1 \sigma'_\eta(x - u_j) |f_\eta(x; a, u) - f_\eta(x; a_0^*(u), u)| dx &\leq \|a - a_0^*(u)\|_1 \int_0^1 \sigma'_\eta(x - u_j) dx \\ &\leq \|a - a_0^*(u)\|_1. \end{aligned}$$

478 Returning to our initial upper bound, we obtain, using the first statement of the Lemma,

$$\begin{aligned} \left| \frac{\partial L_\eta}{\partial u_j}(a, u) - \frac{\partial L_\eta}{\partial u_j}(a_0^*(u), u) \right| &\leq 2M \|a - a_0^*(u)\| + (|a_{0,j}^*(u)| + |a_j - a_{0,j}^*(u)|) \|a - a_0^*(u)\|_1 \\ &\leq 2M \|a - a_0^*(u)\| + (2M + \|a - a_0^*(u)\|) \sqrt{m+1} \|a - a_0^*(u)\| \\ &= 2M(\sqrt{m+1} + 1) \|a - a_0^*(u)\| + \sqrt{m+1} \|a - a_0^*(u)\|^2. \end{aligned}$$

479

□

480 **Lemma 7.** For  $\eta \geq 0$  and  $u \in \mathcal{U}_\eta$ ,

$$\|a_\eta^*(u) - a_0^*(u)\| \leq \frac{16M\sqrt{m+1}\eta}{\Delta(u)}.$$

481 *Proof.* By (11),

$$H_\eta(u)a_\eta^*(u) = b_\eta(u)$$

482 and by (11) and by Lemma 2,

$$H_\eta(u)a_0^*(u) = H_0(u)a_0^*(u) + D_\eta a_0^*(u) = b_0(u) + D_\eta a_0^*(u).$$

483 According to Proposition 1 (whose proof does not rely on this lemma),  $H_\eta(u)$  is invertible with

484  $\|H_\eta(u)^{-1}\| \leq 8/\Delta(u)$ . We thus have

$$\begin{aligned} \|a_\eta^*(u) - a_0^*(u)\| &= \|H_\eta(u)^{-1}(H_\eta(u)a_\eta^*(u) - H_\eta(u)a_0^*(u))\| \\ &\leq \frac{8}{\Delta(u)} \|b_\eta(u) - b_0(u) - D_\eta a_0^*(u)\| \\ &\leq \frac{8}{\Delta(u)} (\|b_\eta(u) - b_0(u)\| + \|D_\eta a_0^*(u)\|) \\ &\leq \frac{8}{\Delta(u)} (\|b_\eta(u) - b_0(u)\| + \frac{\eta}{2} \|a_0^*(u)\|). \end{aligned}$$

485 The result then unfolds from Lemmas 1 and 6. □

486 **Lemma 8.** Let  $\eta > 0$ ,  $u \in \mathbb{R}^m$  and  $a, a' \in \mathbb{R}^{m+1}$ . Then

$$\begin{aligned} \|\nabla_u L_\eta(a, u)\| &\leq \sqrt{m+1} \|a\|^2 + M \|a\|, \\ \|\nabla_a L_\eta(a, u)\| &\leq \sqrt{m+1} (\|a\| \sqrt{m+1} + M). \end{aligned}$$

487 As a consequence of the second inequality, by the fundamental theorem of calculus for line integrals,

$$|L_\eta(a, u) - L_\eta(a', u)| \leq \sqrt{m+1} (\max(\|a\|, \|a'\|) \sqrt{m+1} + M) \|a - a'\|.$$

488 *Proof.* Recall that, for all  $j \in \{1, \dots, m\}$ , and for all  $a, u \in \mathbb{R}^m$ ,

$$\begin{aligned} \frac{\partial L_\eta}{\partial u_j}(a, u) &= -a_j \int_0^1 \sigma'_\eta(x - u_j) \left( \sum_{k=0}^m a_k \sigma_\eta(x - u_k) - f^*(x) \right) dx, \\ \frac{\partial L_\eta}{\partial a_j}(a, u) &= \int_0^1 \sigma_\eta(x - u_j) \left( \sum_{k=0}^m a_k \sigma_\eta(x - u_k) - f^*(x) \right) dx. \end{aligned}$$

489 From the first equality, we have

$$\begin{aligned} \left| \frac{\partial L_\eta}{\partial u_j}(a, u) \right| &\leq |a_j| \int_0^1 |\sigma'_\eta(x - u_j)| \left( \sum_{k=1}^m |a_k| \sigma_\eta(x - u_k) + |f^*(x)| \right) dx \\ &\leq |a_j| (\|a\|_1 + M) \int_0^1 |\sigma'_\eta(x - u_j)| dx \\ &\leq |a_j| (\|a\|_1 + M). \end{aligned}$$

490 As a consequence,

$$\|\nabla_u L_\eta(a, u)\| \leq \|a\|(\|a\|_1 + M) \leq \sqrt{m+1}\|a\|^2 + M\|a\|.$$

491 Similarly, from the second equality, we have

$$\left| \frac{\partial L_\eta}{\partial a_j}(a, u) \right| \leq \|a\|_1 + M.$$

492 As a consequence,

$$\|\nabla_a L_\eta(a, u)\| \leq \sqrt{m+1}(\|a\|_1 + M) = \sqrt{m+1}(\|a\|\sqrt{m+1} + M).$$

493

□

494 **Lemma 9.** Consider  $\eta \geq 0$  and  $u \in \mathcal{U}_\eta$  such that there is a neuron at distance less than  $\eta$  from each  
495 discontinuity of  $f^*$  and  $3\eta \leq \Delta v$ . Then

$$\int_0^1 |f_\eta(x; a_\eta^*(u), u) - f^*(x)|^2 dx \leq 6M^2\eta n.$$

496 *Proof.* By definition of  $a_\eta^*(u)$ ,

$$\int_0^1 |f_\eta(x; a_\eta^*(u), u) - f^*(x)|^2 dx = \min_{a \in \mathbb{R}^{m+1}} \int_0^1 |f_\eta(x; a, u) - f^*(x)|^2 dx.$$

497 Thus it is enough to exhibit some  $a$  for which the latter integral is smaller than  $6M^2\eta n$  to conclude.

498 We construct such an  $a$  as follows: set  $a_0 = f^*(0)$ , and for each discontinuity  $v_i$ , set the coefficient  
499 of a neuron at distance less than  $\eta$  to the value  $f_i^* - f_{i-1}^*$  and set all other neurons to zero. Note that  
500 the active neurons are distinct since  $3\eta \leq \Delta v$ .

501 Then the neural network is equal to the target function everywhere except on an interval of size  $3\eta/2$   
502 around each discontinuity, where they disagree (in infinite norm) by at most  $2M$ .

503

□

504 **Lemma 10.** Let  $m$  be a positive integer and  $u_1, \dots, u_m$  be i.i.d. uniform random variables in  $[0, 1]$ .  
505 Assume that

$$m \geq \frac{6}{\Delta v} \left( 4 + \log n + \log \frac{1}{\delta} \right).$$

506 Then, with probability at least  $1 - \delta$ , the vector  $u$  is  $D$ -good with  $D = \frac{\delta}{6(m+1)^2}$ .

507 *Proof.* We define the following events:

508 (a)  $A$  is the event “there are at least 6 positions  $u_j$  in each interval  $[v_i, v_{i+1}]$  for  $i \in \{0, \dots, n-1\}$ ”,  
509

510 (b)  $B$  is the event “ $\Delta(u) \geq D$ ”,

511 (c) for all  $i \in \{1, \dots, n-1\}$ ,  $E_i$  is the event “there are at least one neuron on the left and on  
512 the right of  $v_i$ ” and  $C_i$  is the event “ $E_i$  holds and  $|u_i^R + u_i^L - 2v_i| \geq D$ ”.

513 Note that by Definition 2,  $u$  is  $D$ -good if and only if the event  $A \cap B \cap (\bigcap_i C_i)$  holds. To show that  
514 this holds with high probability, we bound the probability of the complement

$$\begin{aligned} \left( A \cap B \cap \left( \bigcap_i C_i \right) \right)^c &= A^c \cup B^c \cup \left( \bigcup_i C_i^c \right) = A^c \cup B^c \cup \left( \bigcup_i (C_i^c \cap A) \right) \\ &\subset A^c \cup B^c \cup \left( \bigcup_i (C_i^c \cap E_i) \right) \quad (\text{as } A \subset E_i). \end{aligned}$$

515 Thus

$$\mathbb{P}(u \text{ is not } D\text{-good}) \leq \mathbb{P}(A^c) + \mathbb{P}(B^c) + \sum_{i=1}^{n-1} \mathbb{P}(C_i^c \cap E_i).$$

516 Below, we bound separately the three terms of the right hand side.

517 (a) Denote  $m' = \lfloor m/6 \rfloor$ . For any  $i \in \{0, \dots, n-1\}$ , the set  $\mathcal{A}_i = \{j \in \{1, \dots, m'\} \mid u_j \in$   
 518  $[v_i, v_{i+1}]\}$  is empty with probability  $(1 - (v_{i+1} - v_i))^{m'} \leq (1 - \Delta v)^{m'}$ . Thus by the  
 519 union bound, the probability that at least one of  $\mathcal{A}_1, \dots, \mathcal{A}_n$  is empty is upper bounded by  
 520  $n(1 - \Delta v)^{m'}$ .

521 We now check that  $n(1 - \Delta v)^{m'} \leq \delta/18$ . Indeed,

$$m' = \left\lfloor \frac{m}{6} \right\rfloor \geq \frac{m}{6} - 1 \geq \frac{3 + \log n + \log \frac{1}{\delta}}{\Delta v} \geq \frac{\log n + \log \frac{18}{\delta}}{\Delta v} \geq -\frac{\log n + \log \frac{18}{\delta}}{\log(1 - \Delta v)},$$

522 where we use  $\Delta v \leq 1$ ,  $3 \geq \log(18)$ , and  $\log(1 - \Delta v) \leq -\Delta v < 0$ . This gives the desired  
 523 inequality.

524 In other words, the probability that at least one of the intervals  $[v_i, v_{i+1}]$  contains none of  
 525 the  $u_1, \dots, u_{m'}$  is bounded by  $\delta/18$ . As a consequence, by the union bound, the probability  
 526 that at least one of the intervals  $[v_i, v_{i+1}]$  contains strictly less than 6 of the  $u_1, \dots, u_m$  is  
 527 bounded by  $\delta/3$ , i.e.,  $\mathbb{P}(A^c) \leq \delta/3$ .

528 (b) Recall that by convention,  $u_0 = -\frac{\eta}{2}$  and  $u_{m+1} = 1 + \frac{\eta}{2}$ . For all  $i \in \{0, \dots, m+1\}$ , denote  
 529  $I_i = (u_i - D, u_i + D)$ . Denote  $F_j$  the event " $u_j \in I_i$  for some  $i \in \{0, \dots, m+1\}, i \neq j$ ".  
 530 Note that  $B^c = \cup_{j=1}^m F_j$ .

531 Fix  $j = 1, \dots, m$ . By conditioning on  $u_i$  for all  $i \in \{0, \dots, m+1\}, i \neq j$ , we see that  
 532  $\mathbb{P}(F_j) \leq 2(m+1)D$ . By the union bound,

$$\mathbb{P}(B^c) \leq 2m(m+1)D \leq \frac{\delta}{3}.$$

533 (c) Take  $i \in \{1, \dots, n-1\}$ . For convenience, we define the random variable  $u_i^L$  (resp.  $u_i^R$ ) on  
 534 the full probability space by setting  $u_i^L = 0$  (resp.  $u_i^R = 1$ ) when there is no neuron on the  
 535 left (resp. the right) of  $v_i$ . We compute the joint cumulative distribution function of  $(u_i^L, u_i^R)$   
 536 (with a convenient change of inequality): for all  $0 \leq y \leq v_i \leq z \leq 1$ ,

$$\mathbb{P}(u_i^L \leq y, u_i^R \geq z) = \mathbb{P}(\forall j \in \{1, \dots, m\}, u_j \notin [y, z]) = (1 - (z - y))^m.$$

537 We observe that the joint cumulative distribution function of  $(u_i^L, u_i^R)$  is a smooth function  
 538 of  $(y, z)$  when  $(y, z) \in (0, v_i) \times (v_i, 1)$ . Note that the events  $E_i$  and  $\{(u_i^L, u_i^R) \in (0, v_i) \times$   
 539  $(v_i, 1)\}$  are equal up to a null set. Therefore, on this event,  $(u_i^L, u_i^R)$  is an absolutely  
 540 continuous random variable with density  $g : (0, v_i) \times (v_i, 1) \rightarrow \mathbb{R}$ ,

$$g(y, z) = -\frac{\partial^2}{\partial y \partial z} \mathbb{P}(u_i^L \leq y, u_i^R \geq z) = m(m-1)(1 - (z - y))^{m-2}.$$

541 We compute

$$\begin{aligned} \mathbb{P}(C_i^c \cap E_i) &= \mathbb{P}(\{|u_i^R + u_i^L - 2v_i| \leq D\} \cap E_i) \\ &= \int_{\{0 < y < v_i < z < 1\}} m(m-1)(1 - (z - y))^{m-2} \mathbf{1}_{\{|y+z-2v_i| \leq D\}} dy dz. \end{aligned}$$

542 We make the change of variables  $\theta = z - y$ ,  $\nu = z + y$ .

$$\begin{aligned} \mathbb{P}(C_i^c \cap E_i) &= \frac{m(m-1)}{2} \int_{\{0 < \frac{\nu-\theta}{2} < v_i < \frac{\nu+\theta}{2} < 1\}} (1 - \theta)^{m-2} \mathbf{1}_{|\nu-2v_i| \leq D} d\theta d\nu \\ &\leq \frac{m(m-1)}{2} \left( \int_0^1 (1 - \theta)^{m-2} d\theta \right) \left( \int_{-\infty}^{\infty} \mathbf{1}_{|\nu-2v_i| \leq D} d\nu \right) \\ &= Dm. \end{aligned}$$

543 Using  $m \geq 24/\Delta v \geq 24n$ , we have

$$\sum_{i=1}^{n-1} \mathbb{P}(C_i^c \cap E_i) \leq (n-1)Dm \leq \frac{\delta}{24 \times 6} \leq \frac{\delta}{3}.$$

544 This concludes the proof.

545

□



## 546 B Proofs of the results of the main text

### 547 B.1 Proof of Proposition 1

548 Let us lower-bound the smallest eigenvalue of  $H_\eta(u)$  which is equal to

$$\min_{\|a\|=1} a^\top H_\eta(u) a.$$

549 Now for  $a \in \mathbb{R}^{m+1}$  such that  $\|a\| = 1$ ,

$$a^\top H_\eta(u) a = \sum_{i,j=0}^m a_i a_j \int_0^1 \sigma_\eta(x - u_i) \sigma_\eta(x - u_j) dx = \int_0^1 \left( \sum_{i=0}^m a_i \sigma_\eta(x - u_i) \right)^2 dx.$$

550 Since  $\Delta u > 2\eta$  (because  $u \in \mathcal{U}$ ) and  $u_0 = -\eta/2$ ,  $u_{m+1} = 1 + \eta/2$ , the intervals  $[u_i + \eta/2, u_{i+1} - \eta/2]$   
551 for  $i \in \{0, \dots, m\}$  are disjoint and included in  $[0, 1]$ . Thus

$$a^\top H_\eta(u) a \geq \sum_{i=0}^m \int_{u_i + \eta/2}^{u_{i+1} - \eta/2} \left( \sum_{k=0}^m a_k \sigma_\eta(x - u_k) \right)^2 dx.$$

552 Since  $\sigma(x) = 0$  if  $x < -1/2$  and  $\sigma(x) = 1$  if  $x > 1/2$ , we have that  $\sigma_\eta(x) = 0$  if  $x < -\eta/2$  and  
553  $\sigma_\eta(x) = 1$  if  $x > \eta/2$ . Further recall that the  $u_i$  are ordered in increasing order. As a consequence,

$$\begin{aligned} a^\top H_\eta(u) a &\geq \sum_{i=0}^m \int_{u_i + \eta/2}^{u_{i+1} - \eta/2} \left( \sum_{k=0}^i a_k \right)^2 dx \\ &= \sum_{i=0}^m (u_{i+1} - u_i - \eta) \left( \sum_{k=0}^i a_k \right)^2 \\ &\geq \frac{\Delta(u)}{2} \sum_{i=0}^m \left( \sum_{k=0}^i a_k \right)^2, \end{aligned} \tag{12}$$

554 where in the last step, we used that  $\Delta(u) > 2\eta$  and thus  $u_{i+1} - u_i - \eta \geq \Delta(u) - \eta \geq \Delta(u) -$   
555  $\Delta(u)/2 = \Delta(u)/2$ . Now, denote  $c_0 = 0$  and  $c_i = \sum_{k=0}^{i-1} a_k$ . Then  $\|a\| = 1$  writes

$$\sum_{i=0}^m (c_{i+1} - c_i)^2 = 1.$$

556 Furthermore,

$$\sum_{i=0}^m (c_{i+1} - c_i)^2 = \sum_{i=0}^m c_{i+1}^2 + \sum_{i=0}^m c_i^2 - 2 \sum_{i=0}^m c_{i+1} c_i \leq 4 \sum_{i=0}^{m+1} c_i^2.$$

557 Hence

$$\sum_{i=0}^{m+1} c_i^2 \geq \frac{1}{4},$$

558 which shows in conjunction with (12) that the smallest eigenvalue of  $H_\eta(u)$  is lower-bounded by  $\frac{\Delta u}{8}$ .

### 559 B.2 Proof of Proposition 2

560 To show that  $G(u) = (\nabla_u L_\eta)(a_\eta^*(u), u)$  is Lipschitz-continuous on  $\mathcal{U}_\eta$ , we show that it is differen-  
561 tiable on  $\mathcal{U}_\eta$  and that its derivatives are uniformly bounded. The chain rule gives

$$\frac{\partial G_j}{\partial u_k} = \sum_{l=0}^m \frac{\partial a_{\eta,l}^*}{\partial u_k}(u) \frac{\partial^2 L_\eta}{\partial u_j \partial a_l}(a_\eta^*(u), u) + \frac{\partial^2 L_\eta}{\partial u_j \partial u_k}(a_\eta^*(u), u).$$

From (10), using that  $\sigma$  is twice continuously differentiable, it can be checked that  $\frac{\partial L_\eta}{\partial u_j}$  is differentiable in both its arguments and its derivatives are uniformly upper-bounded when  $a$  is bounded. Furthermore, for  $u \in \mathcal{U}_\eta$ ,

$$\|a_\eta^*(u)\| \leq \|H_\eta(u)^{-1}\| \|b_\eta(u)\| \leq \frac{8M\sqrt{m+1}}{\Delta(u)},$$

by Lemma 1 and Proposition 1. Finally, according to Lemma 3,  $a_\eta^*$  is differentiable with derivatives uniformly upper-bounded on  $\mathcal{U}_\eta$ . This concludes the proof.

### B.3 Proof of Proposition 3

In this proof, we denote  $u_i^L(\tau)$  (resp.  $u_i^R(\tau)$ ) the position at time  $\tau$  of the neuron that is *at initialization* closest to  $v_i$  to the left (resp. the right). Note that because of the movement of the neurons, it could be that  $u_i^L$  (resp.  $u_i^R$ ) does not remain the neuron closest to the left (resp. the right) throughout the dynamics. Our proof discusses when this phenomenon occurs. Similarly, denote  $u_i^{LL}$  (resp.  $u_i^{RR}$ ) the neuron second closest to the left (resp. the right) of  $v_i$ . Since the initialization is  $D$ -good, note that all these neurons are distinct.

Denote  $\bar{\mathcal{T}}$  the minimal time  $\tau \in [0, \mathcal{T}_{\max})$  such that  $\Delta(u(\tau)) \leq D/2$  or there are less than two neurons in some piece  $[v_i, v_{i+1}]$  of  $f^*$ . Note that by assumption,  $\Delta(u(0)) \geq D > D/2$  and there are at least 6 neurons in each interval at initialization, thus  $\bar{\mathcal{T}} > 0$ . Furthermore, using the trivial inequalities  $M \geq \Delta f/2$ ,  $m+1 \geq 1$  and  $\eta^{1/2} \geq \eta$ , we have  $\frac{D}{2} = \frac{2^{11/2}M\sqrt{m+1}\sqrt{\eta}}{\Delta f} \geq 8\eta > 2\eta$ . Recall that  $2\eta$  is the quantity defining the set  $\mathcal{U}_\eta$  supporting the maximal solution of the equation (8). As a consequence, we do have  $\bar{\mathcal{T}} < \mathcal{T}_{\max}$ . At the end of the proof, we check that  $\mathcal{T} < \bar{\mathcal{T}}$ , by controlling carefully the movement of each neuron.

Let us first bound the difference between the dynamics of  $u$  and the dynamics that we would have if at each time  $\tau$ , the weights  $a$  were given by  $a_0^*(u(\tau))$ , the best approximation of  $f^*$  by a piecewise constant function with subdivision  $u(\tau)$ . For any  $\tau < \bar{\mathcal{T}}$  and  $j \in \{1, \dots, m\}$ , by Lemma 6, we have

$$\begin{aligned} & \left| \frac{du_j}{d\tau}(\tau) + \frac{\partial L_\eta}{\partial u_j}(a_0^*(u(\tau)), u(\tau)) \right| \\ &= \left| \frac{\partial L_\eta}{\partial u_j}(a_\eta^*(u(\tau)), u(\tau)) - \frac{\partial L_\eta}{\partial u_j}(a_0^*(u(\tau)), u(\tau)) \right| \\ &\leq 2M(\sqrt{m+1}+1)\|a_\eta^*(u(\tau)) - a_0^*(u(\tau))\| + \sqrt{m+1}\|a_\eta^*(u(\tau)) - a_0^*(u(\tau))\|^2. \end{aligned} \quad (13)$$

We are therefore led to bounding  $\|a_\eta^*(u(\tau)) - a_0^*(u(\tau))\|$ , as follows:

$$\begin{aligned} \|a_\eta^*(u(\tau)) - a_0^*(u(\tau))\| &\leq \frac{2^4 M \sqrt{m+1} \eta}{\Delta(u(\tau))} && \text{(by Lemma 7)} \\ &\leq \frac{2^5 M \sqrt{m+1} \eta}{D} && \text{(since } \Delta(u(\tau)) \geq D/2) \\ &= \frac{D(\Delta f)^2}{2^8 M \sqrt{m+1}} && \text{(by definition of } D). \end{aligned}$$

Then the first term in (13) is less than

$$\frac{(\sqrt{m+1}+1)D(\Delta f)^2}{2^7 \sqrt{m+1}} \leq \frac{D(\Delta f)^2}{2^6},$$

and the second term in (13) is less than

$$\frac{D^2(\Delta f)^4}{2^{16} M^2 \sqrt{m+1}} \leq \frac{D(\Delta f)^2}{2^{14}}, \quad \text{using } D \leq \Delta(u(0)) \leq 1, \Delta f \leq 2M \text{ and } m+1 \geq 1.$$

Hence we obtain, for any  $\tau < \bar{\mathcal{T}}$  and  $j \in \{1, \dots, m\}$ ,

$$\left| \frac{du_j}{d\tau}(\tau) + \frac{\partial L_\eta}{\partial u_j}(a_0^*(u(\tau)), u(\tau)) \right| \leq \frac{D(\Delta f)^2}{60} =: \Delta g \quad (14)$$

Now, let us examine how the neurons move, by leveraging Lemma 4 that gives exact formulae for  $\frac{\partial L_\eta}{\partial u_j}(a_0^*(u(\tau)), u(\tau))$ . First, if  $u_j$  is not next to a discontinuity,  $\frac{\partial L_\eta}{\partial u_j}(a_0^*(u(\tau)), u(\tau)) = 0$ , hence

$$|u_j(\tau) - u_j(0)| \leq (\Delta g)\tau.$$

Let us now study what happens next to a discontinuity  $v_i$ . Denote  $(\delta f)_i = f_i^* - f_{i-1}^*$ . W.l.o.g., assume that

$$u_i^R(0) - v_i > v_i - u_i^L(0).$$

In the reverse case, the proof is the same by swapping the roles of  $u_i^L$  and  $u_i^R$ , and of  $u_i^{LL}$  and  $u_i^{RR}$ . We are going to show that the dynamics of  $u_i^L$  are divided into two phases. Define  $\mathcal{T}_i$  as the minimal  $\tau \in [0, \bar{\mathcal{T}}]$  such that  $u_i^L(\tau) = v_i - \eta/2$ . In the first phase  $[0, \mathcal{T}_i]$ , we have  $u_i^L(\tau) < v_i - \eta/2$  and  $u_i^L$  moves towards  $v_i$ . In the second phase  $[\mathcal{T}_i, \bar{\mathcal{T}}]$ , we show below that  $u_i^L(\tau) \in [v_i - \eta, v_i + \eta]$ . Note that we can have  $\mathcal{T}_i = 0$  if  $u_i^L(0) \geq v_i - \eta/2$ . It is also possible that  $\mathcal{T}_i = \infty$  a priori; this means that the second phase does not exist. We show below that this case does not happen. Figure 6 depicts the two phases.

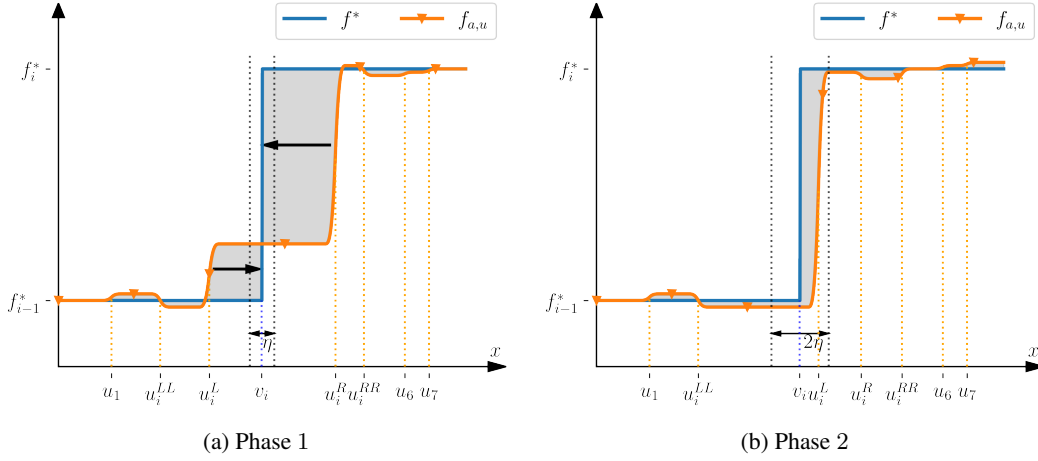

Figure 6: Dynamics of the neurons next to a discontinuity  $v_i$ . In the first phase,  $u_i^L$  and  $u_i^R$  move towards  $v_i$ , until the closest neuron (in this case  $u_i^L$ ) reaches the interval of size  $\eta$  centered in  $v_i$ . In the second phase,  $u_i^L$  remains in an interval of size  $2\eta$  around  $v_i$ , and none of the neurons move significantly.

Beginning by the first phase, we have, while  $u_i^L(\tau) < v_i - \eta/2$  and  $u_i^R(\tau) > v_i + \eta/2$ , according to Lemma 4,

$$\begin{aligned} \frac{\partial L_\eta}{\partial u_i^L}(a_0^*(u(\tau)), u(\tau)) &= -\frac{1}{2} \frac{(u_i^R(\tau) - v_i)^2 (\delta f)_i^2}{(u_i^R(\tau) - u_i^L(\tau))^2}, \\ \frac{\partial L_\eta}{\partial u_i^R}(a_0^*(u(\tau)), u(\tau)) &= \frac{1}{2} \frac{(v_i - u_i^L(\tau))^2 (\delta f)_i^2}{(u_i^R(\tau) - u_i^L(\tau))^2}. \end{aligned}$$

For ease of computation, let  $d_i^L(\tau) = v_i - u_i^L(\tau)$  and  $d_i^R(\tau) = u_i^R(\tau) - v_i$  be the distances between the neurons and  $v_i$ . Then, by (14),

$$\begin{aligned} \frac{dd_i^R}{d\tau}(\tau) + \frac{dd_i^L}{d\tau}(\tau) &\leq -\frac{1}{2} \frac{((d_i^R(\tau))^2 + (d_i^L(\tau))^2)(\delta f)_i^2}{(d_i^L(\tau) + d_i^R(\tau))^2} + 2\Delta g \\ &\leq -\frac{(\Delta f)^2}{4} + 2 \frac{D(\Delta f)^2}{60} \leq -\frac{(\Delta f)^2}{5} \end{aligned}$$

since  $D \leq \Delta(u(0)) \leq 1$ . Thus, in some time less than  $\mathcal{T} = \frac{6}{(\Delta f)^2}$ ,  $d_i^R(\tau) + d_i^L(\tau) \leq \eta$ , that is, either  $u_i^L$  reaches  $v_i - \eta/2$  or  $u_i^R$  reaches  $v_i + \eta/2$ . Let us check that the second event cannot actually

605 happen: while  $u_i^L(\tau) < v_i - \frac{\eta}{2}$  and  $u_i^R(\tau) > v_i + \frac{\eta}{2}$ , we also have

$$\begin{aligned} \frac{dd_i^R}{d\tau}(\tau) - \frac{dd_i^L}{d\tau}(\tau) &\geq \frac{((d_i^R(\tau))^2 - (d_i^L(\tau))^2)(\delta f)_i^2}{(d_i^L(\tau) + d_i^R(\tau))^2} - 2\Delta g \\ &= \frac{(d_i^R(\tau) - d_i^L(\tau))(\delta f)_i^2}{d_i^L(\tau) + d_i^R(\tau)} - 2\Delta g. \end{aligned}$$

606 By condition (c) of Definition 2 and by (14), we have  $d_i^R(0) - d_i^L(0) \geq D = \frac{60\Delta g}{(\Delta f)^2} \geq \frac{60\Delta g}{(\delta f)_i^2}$ , and  
 607 furthermore  $d_i^L(\tau) + d_i^R(\tau) \leq 1$ . An easy reasoning then shows that  $d_i^R - d_i^L$  is increasing. Therefore  
 608  $u_i^R$  must remain further away from  $v_i$  than  $u_i^L$ .

609 In summary, we showed that there exists some time  $\mathcal{T}_i \leq \mathcal{T}$  when  $u_i^L(\mathcal{T}_i) = v_i - \frac{\eta}{2}$ , which marks the  
 610 end of the first phase, and we also have

$$d_i^R(\mathcal{T}_i) - d_i^L(\mathcal{T}_i) \geq d_i^R(0) - d_i^L(0) \geq D.$$

611 Moving on to the study of the second phase, let us show that  $u_i^L(\tau)$  stays in the interval  $[v_i - \eta, v_i + \eta]$   
 612 for  $\tau \in [\mathcal{T}_i, \bar{\mathcal{T}}]$ . Consider any  $\tau \leq \bar{\mathcal{T}}$  such that  $u_i^L(\tau) = v_i - \eta$ . Then we have by (14) and Lemma 4

$$\frac{du_i^L}{d\tau}(\tau) \geq \frac{(u_i^R(\tau) - v_i)^2(\delta f)_i^2}{(u_i^R(\tau) - v_i + \eta)^2} - \Delta g \geq \Delta g, \quad (15)$$

613 where the second upper bound comes from the fact that we have  $u_i^R(\tau) - v_i \geq \frac{D}{2} - \eta$  since  
 614  $\Delta(u(\tau)) \geq D/2$ , and furthermore,  $x \mapsto \frac{x^2}{(x+\eta)^2}$  is increasing, hence

$$\frac{(u_i^R - v_i)^2(\delta f)_i^2}{(u_i^R - v_i + \eta)^2} \geq \left(\frac{\frac{D}{2} - \eta}{\frac{D}{2}}\right)^2 \Delta f^2 \underset{(D/2 \geq 2\eta)}{\geq} \frac{(\Delta f)^2}{4} \geq 2\Delta g.$$

615 Equation (15) implies that  $u_i^L(\tau) \geq v_i - \eta$  for all  $\tau \in [\mathcal{T}_i, \bar{\mathcal{T}}]$ . Similarly, consider any  $\tau \leq \bar{\mathcal{T}}$  such  
 616 that  $u_i^L(\tau) = v_i + \eta$ . Note that, for such a  $\tau$ ,  $u_i^L(\tau)$  is now on the right of  $v_i$ , and the neurons flanking  
 617  $v_i$  are  $u_i^{LL}$  and  $u_i^L$ . Thus we have by (14) and Lemma 4

$$\frac{du_i^L}{d\tau}(\tau) \leq -\frac{(v_i - u_i^{LL}(\tau))^2(\delta f)_i^2}{(v_i + \eta - u_i^{LL}(\tau))^2} + \Delta g \leq -\Delta g,$$

618 where the second lower bound unfolds similarly as previously. This shows that  $u_i^L(\tau) \leq v_i + \eta$  for  
 619 all  $\tau \in [\mathcal{T}_i, \bar{\mathcal{T}}]$ .

620 We now check that  $\mathcal{T} < \bar{\mathcal{T}}$ , that is, for all  $\tau \leq \mathcal{T}$ ,  $\Delta(u(\tau)) > D/2$  and there are at least two neurons  
 621 in each interval  $[v_i, v_{i+1}]$ . Starting with the first condition, we say that neurons  $u_j$  and  $u_k$  collide if  
 622  $|u_j(\tau) - u_k(\tau)| = D/2$  for some  $\tau \leq \mathcal{T}$ . Let us show that no pair of neurons collide.

623 We start by showing that there is no collision between  $u_i^{LL}$  and  $u_i^L$ . In the first phase  $[0, \mathcal{T}_i]$ , we have  
 624  $\frac{du_i^{LL}}{d\tau}(\tau) \leq \Delta g$ . Recall that we also have  $\frac{du_i^L}{d\tau}(\tau) \geq -\Delta g$  and thus for  $\tau \leq \mathcal{T}_i$ ,

$$u_i^L(\tau) - u_i^{LL}(\tau) \geq u_i^L(0) - u_i^{LL}(0) - 2\mathcal{T}\Delta g \geq \frac{4D}{5}$$

625 since  $u_i^L(0) - u_i^{LL}(0) \geq D$  and  $\mathcal{T}\Delta g = D/10$  by definition of  $\mathcal{T}$  and  $\Delta g$ . As a consequence,  $u_i^{LL}$   
 626 and  $u_i^L$  do not collide during the first phase, and we have

$$u_i^{LL}(\mathcal{T}_i) \leq u_i^L(\mathcal{T}_i) - \frac{4D}{5} = v_i - \frac{\eta}{2} - \frac{4D}{5}. \quad (16)$$

627 In the second phase, we can have  $u_i^L \in [v_i, v_i + \eta]$  in which case  $u_i^{LL}$  becomes the neuron flanking  
 628  $v_i$  to the left and  $u_i^L$  the neuron flanking to the right. Then (14) and Lemma 4 give

$$\frac{du_i^{LL}}{d\tau} \leq \frac{(u_i^L(\tau) - v_i)^2(\delta f)_i^2}{(u_i^L(\tau) - u_i^{LL}(\tau))^2} + \Delta g \leq \frac{16\eta^2 M^2}{D^2} + \Delta g.$$

Of course, this bound also holds when  $u_i^L \in [v_i - \eta, v_i]$ , because then  $\frac{du_i^{LL}}{d\tau} \leq \Delta g$ . Thus, in the second phase  $\tau \in [\mathcal{T}_i, \mathcal{T}]$ , by the previous upperbound and the fact that  $u_i^L(\tau) \geq v_i - \frac{\eta}{2}$ ,

$$\begin{aligned} u_i^L(\tau) - u_i^{LL}(\tau) &\geq v_i - \frac{\eta}{2} - \left( u_i^{LL}(\mathcal{T}_i) + (\tau - \mathcal{T}_i) \left( \frac{16\eta^2 M^2}{D^2} + \Delta g \right) \right) \\ &\geq \frac{4D}{5} - \mathcal{T} \left( \frac{16\eta^2 M^2}{D^2} + \Delta g \right), \end{aligned}$$

by (16). Let us now upper-bound each of the last two terms by  $D/10$  to conclude. By definition of  $D$ ,

$$\eta = \frac{(\Delta f)^2 D^2}{2^{13}(m+1)M^2}.$$

Thus

$$\frac{16\eta^2 M^2 \mathcal{T}}{D^2} = \frac{3(\Delta f)^2 D^2}{2^{21}(m+1)^2 M^2} \leq \frac{D}{10}$$

using the definition of  $\mathcal{T}$ ,  $D \leq \Delta(u(0)) \leq 1$ ,  $\Delta f \leq 2M$  and  $m+1 \geq 1$ . Finally,  $\mathcal{T}\Delta g = D/10$ . Thus  $u_i^{LL}$  and  $u_i^L$  do not collide.

We now show that  $u_i^L$  and  $u_i^R$  do not collide. In the first phase  $\tau \in [0, \mathcal{T}_i]$ , we have

$$u_i^R(\tau) - u_i^L(\tau) \geq u_i^R(\tau) - v_i = d_i^R(\tau) \geq d_i^R(\tau) - d_i^L(\tau) \geq D.$$

As a consequence,  $u_i^L$  and  $u_i^R$  do not collide during the first phase, and we have

$$u_i^R(\mathcal{T}_i) \geq D + u_i^L(\mathcal{T}_i) = D + v_i - \frac{\eta}{2}. \quad (17)$$

In the second phase,  $u_i^R$  plays a role symmetric to  $u_i^{LL}$ : it can be, or not, the neuron closest to the right of  $v_i$ , depending on whether  $u_i^L \in [v_i - \eta, v_i]$  or  $u_i^L \in [v_i, v_i + \eta]$ . As for  $u_i^{LL}$ , we can show that in any case, for  $\tau \in [\mathcal{T}_i, \mathcal{T}]$ ,

$$\frac{du_i^R}{d\tau} \geq -\frac{16\eta^2 M^2}{D^2} - \Delta g.$$

Thus one concludes as before: for  $\tau \in [\mathcal{T}_i, \mathcal{T}]$ , by the previous lowerbound and the fact that  $u_i^L(\tau) \leq v_i + \frac{\eta}{2}$ ,

$$u_i^R(\tau) - u_i^L(\tau) \geq u_i^R(\mathcal{T}_i) - (\tau - \mathcal{T}_i) \left( \frac{16\eta^2 M^2}{D^2} + \Delta g \right) - \left( v_i + \frac{\eta}{2} \right).$$

Then, by (17),

$$u_i^R(\tau) - u_i^L(\tau) \geq D - \eta - \mathcal{T} \left( \frac{16\eta^2 M^2}{D^2} + \Delta g \right) > \frac{D}{2},$$

where the last lower-bound unfolds similarly as for  $u_i^{LL}$  and  $u_i^L$ . Thus there is no collision between  $u_i^L$  and  $u_i^R$ .

The reader can check that all other pairs of neurons do not collide, including those involving  $u_0 = -\eta/2$  and  $u_{m+1} = 1 + \eta/2$ . In fact, the proof is easier than for  $u_i^{LL}$ ,  $u_i^L$  and  $u_i^R$ ,  $u_i^R$  because the discontinuity at  $v_i$  attracts these neurons together.

Furthermore, we proved that before time  $\mathcal{T}$  at most one neuron can escape on each side of a piece  $[v_i, v_{i+1}]$  of  $f$ . Since we start with at least four (and even six) neurons per piece, there is always before  $\mathcal{T}$  at least two neurons per piece.

This shows that  $\mathcal{T} < \overline{\mathcal{T}}$ , and we also proved that at time  $\mathcal{T}$ , all discontinuities have finished their first phase, hence there is a neuron at distance less than  $\eta$  from each discontinuity of the target function.

#### B.4 Proof of Theorem 2

Take  $C = 2^{-19}$ . Then by assumption of Theorem 2,

$$\eta \leq \frac{\delta^2 (\Delta f)^2}{2^{19} M^2 (m+1)^5}.$$

Moreover, by the definition of  $D$  from Proposition 3,

$$\eta = \frac{(\Delta f)^2 D^2}{2^{13} M^2 (m+1)}.$$

This implies that

$$D^2 \leq \frac{\delta^2}{2^6 (m+1)^4},$$

and in consequence

$$D \leq \frac{\delta}{6(m+1)^2}.$$

Then Lemma 10 shows that the initialization is  $D$ -good with probability at least  $1 - \delta$  (since the  $D$ -good property is monotonous in  $D$ ).

Hence, with probability at least  $1 - \delta$ , according to Proposition 3, the maximal solution to (8) is defined at least until  $\mathcal{T}$  and at that time, there is a neuron at distance less than  $\eta$  from each discontinuity of the target function. Furthermore,  $3\eta \leq \frac{1}{m+1} \leq \frac{1}{n} \leq \Delta v$ , hence Lemma 9 applies. This implies that

$$\int_0^1 |f^*(x) - f(x; a^*(u(\mathcal{T})), u(\mathcal{T}))|^2 dx \leq 6M^2 \eta n.$$

The assumption on  $\eta$  allow to conclude that the upper-bound is less than  $\xi$ .

**Remark 2.** We did not try to optimize the value of  $C$  since our goal was to show convergence to a global optimum and the dependency of the dynamics on the parameters (for instance, it is remarkable that  $\mathcal{T}$  does not depend on  $\xi$ ).

## B.5 Proof of Proposition 4

For  $s \leq t$ , Proposition 1 holds since for  $\Delta(u(s)) \geq 16\eta > 2\eta$ . Thus  $a_\eta^*(u(s))$  is well-defined and verifies

$$\nabla_a L_\eta(a_\eta^*(u(s)), u(s)) = 0.$$

Let, for  $s \leq t$ ,  $V(s) = \|a(s) - a_\eta^*(u(s))\|$ . Recall that, by (11),

$$\nabla_a L_\eta(a, u) = H_\eta(u)a - b_\eta(u).$$

Hence, for  $s \leq t$ ,

$$\begin{aligned} & \langle a(s) - a_\eta^*(u(s)), \nabla_a L_\eta(a(s), u(s)) \rangle \\ &= \langle a(s) - a_\eta^*(u(s)), \nabla_a L_\eta(a(s), u(s)) - \nabla_a L_\eta(a_\eta^*(u(s)), u(s)) \rangle \\ &= \langle a(s) - a_\eta^*(u(s)), H_\eta(u(s))(a(s) - a_\eta^*(u(s))) \rangle \\ &\geq \frac{\Delta(u(s))}{8} V(s)^2 \\ &\geq \frac{D}{16} V(s)^2, \end{aligned}$$

where the first lower bound is a consequence of Proposition 1. Then we have, for any  $s \leq t$ ,

$$\begin{aligned} \frac{d}{ds} \left( \frac{1}{2} V(s)^2 \right) &= \left\langle a(s) - a_\eta^*(u(s)), \frac{da}{ds}(s) - \frac{d}{ds} a_\eta^*(u(s)) \right\rangle \\ &= \left\langle a(s) - a_\eta^*(u(s)), -\nabla_a L_\eta(a(s), u(s)) - \frac{d}{ds} a_\eta^*(u(s)) \right\rangle \\ &\leq -\frac{D}{16} V(s)^2 + \left\| \frac{d}{ds} a_\eta^*(u(s)) \right\| V(s). \end{aligned}$$

Let us now upper bound the norm appearing in the second term. We first have by the chain rule

$$\frac{d}{ds} a_\eta^*(u(s)) = \frac{\partial a_\eta^*}{\partial u}(u(s)) \frac{du}{ds}(s).$$

By Lemma 3 (which holds since for  $\Delta(u(s)) \geq 16\eta > 2\eta$ ),

$$\left\| \frac{\partial a_\eta^*}{\partial u}(u(s)) \right\| \leq \frac{8}{\Delta(u(s))} (2(m+1)\|a_\eta^*(u(s))\| + M).$$

Besides,

$$\left\| \frac{du}{ds}(s) \right\| \leq \varepsilon \|\nabla_u L_\eta(a(s), u(s))\|.$$

By Lemma 8,

$$\|\nabla_u L_\eta(a(s), u(s))\| \leq \sqrt{m+1}\|a(s)\|^2 + M\|a(s)\|. \quad (18)$$

Furthermore,

$$\|a(s)\| \leq \|a_\eta^*(u(s))\| + \|a(s) - a_\eta^*(u(s))\| = \|a_\eta^*(u(s))\| + V(s).$$

By Lemmas 6 and 7, which apply since  $\Delta(u(s)) > 2\eta$  and since there are at least two positions  $u_j(s)$  in each interval  $[v_i, v_{i+1}]$  for  $s \leq t$ ,

$$\begin{aligned} \|a_\eta^*(u(s))\| &\leq \|a_0^*(u(s))\| + \|a_0^*(u(s)) - a_\eta^*(u(s))\| \\ &\leq 2M\sqrt{m+1} + \frac{16M\sqrt{m+1}\eta}{\Delta(u(s))} \\ &\leq 2M\sqrt{m+1} + \frac{32M\sqrt{m+1}\eta}{D} \\ &\leq 3M\sqrt{m+1}, \end{aligned}$$

where the last upper bound is implied by the assumption  $D \geq 32\eta$ .

Now define  $T_{\max} = \inf \{s \geq 0, V(s) > 3M\sqrt{m+1}\}$  and assume  $s \leq \min(t, T_{\max})$  so that  $V(s) \leq 3M\sqrt{m+1}$ . Then we proved that  $\|a(s)\| \leq 6M\sqrt{m+1}$ . Going back to (18), we deduce that

$$\|\nabla_u L_\eta(a(s), u(s))\| \leq 36M^2(m+1)^{3/2} + 6M^2\sqrt{m+1} \leq 2^6 M^2(m+1)^{3/2}. \quad (19)$$

Putting everything together, we obtain

$$\left\| \frac{d}{ds} a_\eta^*(u(s)) \right\| \leq \frac{2^9 M^2(m+1)^{3/2}}{\Delta(u(s))} (6M(m+1)^{3/2} + M)\varepsilon \leq \frac{2^{13} M^3(m+1)^3}{D} \varepsilon.$$

All in all,

$$\frac{d}{ds} \left( \frac{1}{2} V(s)^2 \right) \leq -\frac{D}{16} V(s)^2 + \frac{2^{13} M^3(m+1)^3}{D} \varepsilon V(s).$$

Hence

$$\frac{d}{ds} (V(s)) = \frac{1}{V(s)} \frac{d}{ds} \left( \frac{1}{2} V(s)^2 \right) \leq -\frac{D}{16} V(s) + \frac{2^{13} M^3(m+1)^3}{D} \varepsilon.$$

By Grönwall's inequality, for all  $s \leq \min(t, T_{\max})$ ,

$$V(s) \leq \exp^{-\frac{D}{16}s} V(0) + \frac{2^{17} M^3(m+1)^3}{D^2} \varepsilon (1 - \exp^{-\frac{D}{16}s}) \quad (20)$$

$$\leq \exp^{-\frac{D}{16}s} V(0) + \frac{2^{17} M^3(m+1)^3}{D^2} \varepsilon. \quad (21)$$

Finally note that  $V(0) = \|a_\eta^*(0)\| \leq 2M\sqrt{m+1}$  and  $\frac{2^{17} M^3(m+1)^3 \varepsilon}{D^2} \leq 2M\sqrt{m+1}$  by the assumption of the Proposition on  $\varepsilon$ . Hence (20) implies that for all  $s \leq \min(t, T_{\max})$ ,  $V(s)$  is a (weighted) average of two terms less than  $2M\sqrt{m+1}$  hence it is less than  $2M\sqrt{m+1}$ . This shows that  $T_{\max} \geq t$ , which concludes the proof since (21) is then valid for  $s = t$ .

## 692 B.6 Proof of Theorem 1

693 In the proof, we take  $C_1 = 2^{-21}$  and  $C_2 = 2^{-36}$ . Denote

$$D = \frac{\delta}{6(m+1)^2}.$$

694 Lemma 10 shows that the initialization is  $D$ -good with probability at least  $1 - \delta$ . In the following,  
695 we study the case where this event happens.

696 Denote  $\bar{T}$  the minimal time  $t > 0$  such that  $\Delta(u(t)) \leq D/2$  or there are less than two neurons in some  
697 piece  $[v_i, v_{i+1}]$  of  $f^*$  or  $\|a(t)\| > 7M\sqrt{m+1}$ . Note that  $\bar{T} > 0$  since the initialization is  $D$ -good.  
698 By Lemma 8,  $\nabla_u L_\eta$  and  $\nabla_a L_\eta$  are Lipschitz-continuous on compacts, hence the solution of the  
699 gradient flow is well defined for  $t < \bar{T}$  since  $\bar{T}$  defines a compact set of parameters.

700 Then all the assumptions of Proposition 4 are satisfied on the time interval  $[0, t]$  for any  $t < \bar{T}$ . More  
701 precisely, the assumptions that do not come directly from the definition of  $\bar{T}$  are the lower bound for  
702  $D$  and the upper bound for  $\varepsilon$ . The lower bound for  $D$  come from

$$D = \frac{\delta}{6(m+1)^2} \geq 32\eta \quad (22)$$

703 by (3) and the simple bounds  $\delta \leq 1$ ,  $\Delta f \leq 2M$ ,  $m+1 \geq 1$ . The upper bound for  $\varepsilon$  comes from (3)  
704 since

$$\varepsilon \leq \frac{\delta^3(\Delta f)^2}{2^{36}M^4(m+1)^{19/2}} \leq \frac{\delta^2}{36 \cdot 2^{16}M^2(m+1)^{13/2}} = \frac{D^2}{2^{16}M^2(m+1)^{5/2}},$$

705 where the second upper bound uses  $m \geq 0$ ,  $\delta \leq 1$  and  $\Delta f \leq 2M$ . Therefore, according to  
706 Proposition 4,

$$\|a(t) - a_\eta^*(u(t))\| \leq 3M\sqrt{m+1} \exp^{-\frac{D}{16}t} + \frac{2^{17}M^3(m+1)^3}{D^2}\varepsilon, \quad (23)$$

707 Furthermore, the proof of Proposition 4 actually implies that

$$\|a_\eta^*(u(t))\| \leq 3M\sqrt{m+1} \quad \text{and} \quad \|a(t)\| \leq 6M\sqrt{m+1}. \quad (24)$$

708 The second bound implies that the condition  $\|a(t)\| > 7M\sqrt{m+1}$  in the definition of  $\bar{T}$  is actually  
709 never active. Let us distinguish between two phases: letting

$$T_0 = \frac{16}{D} \log \left( \frac{2^{16}M^2(m+1)^3}{\delta(\Delta f)^2} \right) = \frac{96(m+1)^2}{\delta} \log \left( \frac{2^{16}M^2(m+1)^3}{\delta(\Delta f)^2} \right),$$

710 then the first phase corresponds to  $t \leq T_0$  and the second phase for  $t \geq T_0$ .

711 **Analysis of the first phase.** In the first phase, each neuron moves at most by

$$\varepsilon T_0 \max_j \left| \frac{\partial L_\eta}{\partial u_j}(a(t), u(t)) \right| \leq \varepsilon T_0 \|\nabla_u L_\eta(a(s), u(s))\| \leq 2^6 \varepsilon T_0 M^2 (m+1)^{3/2},$$

712 where the second upper bound comes from (19) in the proof of Proposition 4. This quantity is less  
713 than  $\frac{D}{8}$  if

$$\frac{6144(m+1)^{7/2}M^2}{\delta} \log \left( \frac{2^{16}M^2(m+1)^3}{\delta(\Delta f)^2} \right) \varepsilon \leq \frac{\delta}{48(m+1)^2}.$$

714 Let us check this condition: we have

$$\begin{aligned} & \frac{6144(m+1)^{7/2}M^2}{\delta} \log \left( \frac{2^{16}M^2(m+1)^3}{\delta(\Delta f)^2} \right) \varepsilon \\ &= \frac{16 \cdot 6144(m+1)^{7/2}M^2}{\delta} \log \left( \frac{2M^{1/8}(m+1)^{3/16}}{\delta^{1/16}(\Delta f)^{1/8}} \right) \varepsilon \\ &\leq \frac{16 \cdot 6144(m+1)^{7/2}M^2}{\delta} \log \left( \frac{4M(m+1)}{\delta \Delta f} \right) \varepsilon, \end{aligned}$$



715 since  $m + 1 \geq 1$ ,  $\delta \leq 1$ , and  $2M/\Delta f \geq 1$ , hence  $(2M/\Delta f)^{1/8} \leq 2M/\Delta f$ . Next, upper-bounding  
 716  $\log(x)$  by  $x$ , we have, by (3),

$$\begin{aligned} \frac{768(m+1)^{7/2}M^2}{\delta} \log\left(\frac{2^{16}M^2(m+1)^3}{\delta(\Delta f)^2}\right) \varepsilon &\leq \frac{64 \cdot 6144(m+1)^{9/2}M^3}{\delta^2 \Delta f} \varepsilon \\ &\leq \frac{6144\delta(\Delta f)}{2^{29}M(m+1)^5} \\ &\leq \frac{\delta}{48(m+1)^2} \end{aligned}$$

717 using  $\Delta f \leq 2M$  and  $m \geq 0$ . Note that the upper bound  $2^6 \varepsilon T_0 M^2 (m+1)^{3/2} \leq D/8$  also implies  
 718 that

$$T_0 \leq \frac{D}{2^9 \varepsilon M^2 (m+1)^{3/2}} \leq \frac{1}{2\varepsilon(\Delta f)^2} = \frac{T}{12} \quad (25)$$

719 since  $m \geq 0$ ,  $D \leq 1$  and  $\Delta f \leq 2M$ . Since each neuron moves by at most  $D/8$  in the time interval  
 720  $[0, T_0]$  and since  $\Delta(u(0)) \geq D$ , we deduce that

$$\Delta(u(T_0)) \geq \frac{3}{4}D. \quad (26)$$

721 Similarly, by condition (c) of the definition of a  $D$ -good vector, for all discontinuities  $v_i$ ,

$$|u_i^R(0) + u_i^L(0) - 2v_i| \geq D,$$

722 thus

$$|u_i^R(T_0) + u_i^L(T_0) - 2v_i| \geq \frac{3}{4}D. \quad (27)$$

723 Furthermore, there at least four neurons on each piece of  $f$  at  $T_0$ , because at most one neuron can  
 724 move out of each piece by either side between 0 and  $T_0$ .

725 **Analysis of the second phase.** Let

$$\Delta a = \frac{D(\Delta f)^2}{2^9 M \sqrt{m+1}} = \frac{\delta(\Delta f)^2}{6 \cdot 2^9 M (m+1)^{5/2}}.$$

726 In the second phase  $t \geq T_0$ , we are able to control by  $\Delta a$  the distance between  $a(t)$  and the  
 727 weights  $a_0^*(u(t))$  that are the best approximation of  $f^*$  by a piecewise affine function with subdivi-  
 728 sion  $u(t)$ . To show this, first note that the first term in (23) is smaller than  $\frac{\Delta a}{4}$  when

$$3M\sqrt{m+1} \exp^{-\frac{D}{16}t} \leq \frac{\Delta a}{4}.$$

729 which is equivalent to

$$t \geq \log\left(\frac{12M\sqrt{m+1}}{\Delta a}\right) \frac{16}{D}.$$

730 which is implied by  $t \geq T_0$ . Furthermore, the second term in (23) is smaller than  $\frac{\Delta a}{4}$  because, by  
 731 definition of  $D$  and by (3),

$$\frac{2^{17}M^3(m+1)^3}{D^2} \varepsilon = \frac{36 \cdot 2^{17}M^3(m+1)^7}{\delta^2} \varepsilon \leq \frac{6^2 \delta(\Delta f)^2}{2^{19}M(m+1)^{5/2}} = \frac{6^3 \Delta a}{2^{10}} \leq \frac{\Delta a}{4}.$$

732 Hence, for all  $T_0 \leq t < \bar{T}$ ,

$$\|a(t) - a_\eta^*(u(t))\| \leq \frac{\Delta a}{2}.$$

Furthermore, note that the assumption of Lemma 7 applies for  $t < \bar{T}$  since  $\Delta(u(t)) \geq \frac{D}{2} > 2\eta$  by (22). Therefore, by Lemma 7 and by (3),

$$\begin{aligned} \|a_\eta^*(u(t)) - a_0^*(u(t))\| &\leq \frac{2^4 M \sqrt{m+1}}{\Delta(u(t))} \eta \\ &\leq \frac{2^5 M \sqrt{m+1}}{D} \eta \\ &= \frac{2^5 \cdot 6M(m+1)^{5/2}}{\delta} \eta \\ &\leq \frac{6\delta(\Delta f)^2}{2^{16} M(m+1)^{5/2}} \\ &= \frac{6^2 \Delta a}{2^7} \leq \frac{\Delta a}{2}. \end{aligned}$$

By the triangular inequality, we deduce the upper bound that we were after, that is

$$\|a(t) - a_0^*(u(t))\| \leq \Delta a.$$

As in the proof of Proposition 3, we can now control the distance between the true dynamics and the one that we would have if the weights were equal to  $a_0^*(u)$ . Namely, for any  $T_0 \leq t \leq \bar{T}$  and  $j \in \{1, \dots, m\}$ , by Lemma 6 (which applies since  $\Delta(u(t)) > 2\eta$  by (22)), we have

$$\begin{aligned} \left| \frac{du_j}{dt}(t) + \frac{\partial L_\eta}{\partial u_j}(a_0^*(u(t)), u(t)) \right| \\ = \left| \frac{\partial L_\eta}{\partial u_j}(a(t), u(t)) - \frac{\partial L_\eta}{\partial u_j}(a_0^*(u(t)), u(t)) \right| \\ \leq 2M(\sqrt{m+1} + 1) \|a(t) - a_0^*(u(t))\| + \sqrt{m+1} \|a(t) - a_0^*(u(t))\|^2. \end{aligned}$$

The first term is less than

$$2M(\sqrt{m+1} + 1)\Delta a = \frac{(\sqrt{m+1} + 1)D(\Delta f)^2}{2^8 \sqrt{m+1}} \leq \frac{D(\Delta f)^2}{2^7},$$

and the second term is less than

$$\sqrt{m+1}(\Delta a)^2 = \frac{D^2(\Delta f)^4}{2^{18} M^2 \sqrt{m+1}} \leq \frac{D(\Delta f)^2}{2^{16}},$$

using  $D \leq \Delta(u(0)) \leq 1$ ,  $\Delta f \leq 2M$  and  $m+1 \geq 1$ . Hence we obtain, for any  $T_0 \leq t \leq \bar{T}$  and  $j \in \{1, \dots, m\}$ ,

$$\left| \frac{du_j}{dt}(t) + \frac{\partial L_\eta}{\partial u_j}(a_0^*(u(t)), u(t)) \right| \leq \frac{D(\Delta f)^2}{120}.$$

We are therefore in a situation very similar to the proof of Proposition 3, starting from (14). One can check that all the arguments used in the proof also apply here. On top of the estimate above that resembles (14), the crucial facts that make the argument of Proposition 3 work here are the bounds (26) and (27) as well as the fact that there are at least four neurons on each piece  $f$  at  $T_0$ , which together are very similar to the conditions ensuring that  $u(0)$  is  $D$ -good in the proof of Proposition 3. Another key point is (25), ensuring that a time at least equal to  $11T/12$  remains after the first phase of this proof, which is enough time for the dynamics described in the proof of Proposition 3 to unfold.

This yields that  $T < \bar{T}$ , and that at time  $T$ , there is a neuron at distance less than  $\eta$  from each discontinuity of  $f^*$ . Furthermore,  $3\eta \leq \frac{1}{m+1} \leq \frac{1}{n} \leq \Delta v$ , hence Lemma 9 applies. Thus

$$\int_0^1 (f_\eta(x; a_\eta^*(u(T)), u(T)) - f^*(x))^2 dx \leq 6M^2 \eta n \leq \frac{\xi}{2},$$

where the second upper bound comes from  $n \leq m+1$  and from (3). Furthermore, by (24) and by Lemma 8,

$$\begin{aligned} |L_\eta(a(T), u(T)) - L_\eta(a_\eta^*(u(T)), u(T))| &\leq \sqrt{m+1}(6M(m+1) + M) \|a(T) - a_\eta^*(u(T))\| \\ &\leq 16M(m+1)^{3/2} \|a(T) - a_\eta^*(u(T))\|. \end{aligned}$$

Let us show that this term is less than  $\xi/4$ . Recall that, by (23),

$$\|a(T) - a_\eta^*(u(T))\| \leq 3M\sqrt{m+1} \exp^{-\frac{P}{16}T} + \frac{2^{17}M^3(m+1)^3}{D^2} \varepsilon.$$

By definition of  $D$  and  $T$ , by using  $\exp(-x) \leq 1/x$  for  $x \geq 1$  and by (3),

$$\begin{aligned} 16M(m+1)^{3/2} \cdot 3M\sqrt{m+1} \exp^{-\frac{P}{16}T} &= 48M^2(m+1)^2 \exp\left(-\frac{\delta}{16(m+1)^2(\Delta f)^2\varepsilon}\right) \\ &\leq \frac{48 \cdot 16M^2(m+1)^4(\Delta f)^2}{\delta} \varepsilon \\ &\leq \frac{48(\Delta f)^2\delta}{2^{31}M^2(m+1)^{9/2}} \xi \\ &\leq \frac{\xi}{8} \end{aligned}$$

using  $\Delta f \leq 2M$ ,  $\delta \leq 1$ , and  $m+1 \geq 1$ . Furthermore, by (3), we get that

$$16M(m+1)^{3/2} \cdot \frac{2^{17}M^3(m+1)^3}{D^2} \varepsilon = \frac{36 \cdot 2^{21}M^4(m+1)^{17/2}}{\delta^2} \varepsilon \leq \frac{\xi}{8}.$$

We therefore obtain the sought  $\xi/4$  upper-bound and can conclude that

$$\begin{aligned} \int_0^1 (f_\eta(x; a(T), u(T)) - f^*(x))^2 dx &\leq \int_0^1 (f_\eta(x; a_\eta^*(u(T)), u(T)) - f^*(x))^2 dx \\ &\quad + 2|L_\eta(a(T), u(T)) - L_\eta(a_\eta^*(u(T)), u(T))| \\ &\leq \xi. \end{aligned}$$

## C Experimental details

**Setting** Our code is available at [XXX]. To obtain Figures 3 and 4, we use the parameters of Table 1. For Figure 5, we use the parameters of Table 2.

| Name           | Value                |
|----------------|----------------------|
| $m$            | 20                   |
| $\varepsilon$  | $2 \cdot 10^{-5}$    |
| $\eta$         | $4 \cdot 10^{-3}$    |
| $P$            | $1.8 \cdot 10^8$     |
| $h$            | $10^{-5}$            |
| Additive noise | Uniform on $[-1, 1]$ |

Table 1: Parameters of Figures 3 and 4.

| Name           | Value                |
|----------------|----------------------|
| $m$            | 20                   |
| $\varepsilon$  | 1                    |
| $\eta$         | $4 \cdot 10^{-3}$    |
| $P$            | $10^6$               |
| $h$            | $10^{-5}$            |
| Additive noise | Uniform on $[-1, 1]$ |

Table 2: Parameters of Figure 5.

The number of iterations in Table 1 is much larger than the one in Table 2, due to the fact that the positions  $u$  evolve at a speed  $\varepsilon h$ , which is much smaller in Table 1. However, note that it is possible

763 to increase  $h$  in Table 1 while keeping the same behavior (in our experiment,  $h$  is kept to the same  
764 value as in Table 2 in order to facilitate the comparison). More precisely, taking  $h = 10^{-3}$  in Table 1  
765 yields similar results while dividing the computational cost by 100.

766 Our target function is defined by  $f^* = 1$  on  $[0., 0.2]$ ,  $[0.35, 0.5]$ ,  $[0.65, 0.8]$ ,  $f^* = 2$  on  $[0.5, 0.65]$   
767 and  $f^* = 4$  elsewhere.

768 **Additional plot** We re-run the same SGD experiment as above twenty times, and plot the average  
769  $L_2$  distance to the target as a function of  $\varepsilon$ , averaging over the initialization randomness and SGD  
770 randomness. This confirms that, in our setting, the SGD is able to recover the target function in the  
771 two-timescale regime ( $\varepsilon \ll 1$ ), but fails outside of the two-timescale regime ( $\varepsilon = 1$ ). The transition  
772 between the two regimes seems to occur for  $\varepsilon \approx 0.1$ .

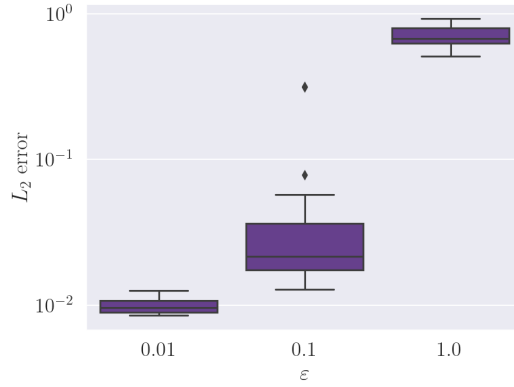

Figure 7:  $L_2$  distance with the target as a function of  $\varepsilon$ , with 20 repeats
